# Supplementary material
Source: PubMed Central journal article supplement (PMC5835023)
Supplement: mmc1.pdf [file mmc1.pdf]

YMTHE, Volume 26

## **Supplemental Information**

### **An Efficient Single-Cell RNA-Seq Approach to Identify Neoantigen-Specific T Cell Receptors**

**Yong-Chen Lu, Zhili Zheng, Paul F. Robbins, Eric Tran, Todd D. Prickett, Jared J. Gartner, Yong F. Li, Satyajit Ray, Zulmarie Franco, Valery Bliskovsky, Peter C. Fitzgerald, and Steven A. Rosenberg**

Supplementary Table 1. 4090 tandem minigene (TMG) library

| TMG ID | Minigene ID | Gene name | Position and change of mutated amino acid | Mutated amino acid sequence      |
|--------|-------------|-----------|-------------------------------------------|----------------------------------|
| 1      | 1           | KCNB2     | S421Y                                     | IALPIPIVNNFYEFYKEQKRQEKA         |
| 1      | 2           | ABR       | P804L                                     | AQVQVLLYYLQHLPISFaelKRNTL        |
| 1      | 3           | MAG       | V81A                                      | YPPVVFKSRTQVAHESFQGRSRLLG        |
| 1      | 4           | ZNF483    | S536L                                     | KCKDCGRPFSDSLSLIQHQRIHTGE        |
| 1      | 5           | FSCB      | Q659P                                     | QPPPAEEAPAEVPPPAEEAPAEVQ         |
| 1      | 6           | MST1R     | V188 frameshift                           | DCVASPLGTRVTG                    |
| 1      | 7           | MMP1      | W13S                                      | MHSFPPLLLLLFSGVVSHSFPATLE        |
| 1      | 8           | PRR35     | E488K                                     | GPQALGEAWGRPKLGPVLTGGTPEP        |
| 1      | 9           | KARS      | S160 frameshift                           | RGEGVKLQVMANSEIINQKKNLFLITNCVGET |
| 1      | 10          | UGT2A3    | P342 frameshift                           | PQKVLWRYKGGKKTIIHRSQYSAV         |
| 1      | 11          | SLC17A2   | D391E                                     | LLILIPGTSNLCESGFIINTLDIAP        |
| 1      | 12          | TMX4      | R102C                                     | KVDVIQEPGLSGCFFVTTLPaffHA        |
| 2      | 13          | OLFML2A   | R355W                                     | DLSVHRETTWKTWLRNRNSYGNCFV        |
| 2      | 14          | TLR5      | R224K                                     | VSVDWGKCMNPFKNMVLELDVSGN         |
| 2      | 15          | SETD1B    | P1268L                                    | PERAPEHDLEVELEPPMMLPLPLQP        |
| 2      | 16          | PCDHA13   | A642T                                     | EISTTRPLDEVDTPHHRLLVLVKDH        |
| 2      | 17          | HYOU1     | R925W                                     | KPRPRPKDKNGTWAEPPLNASASDQ        |
| 2      | 18          | SRRM2     | P1171L                                    | LETAESKEKMALLPQEDATASPPRQ        |
| 2      | 19          | CDRT15L2  | G53R                                      | VRRRTQVPQDSPROALAGQATPEIP        |
| 2      | 20          | PCNT      | R2543H                                    | THLQNQEKLQHLHTALTSAEARGSQ        |
| 2      | 21          | RYR2      | D1621Y                                    | ISERQGWLVQCLYPLQFMSLHIPEE        |
| 2      | 22          | PRSS12    | R630W                                     | VCGLRLLHRRQKWIIGGKNSLRGGW        |
| 2      | 23          | TP53      | V272M                                     | SSGNLLGRNSFEMRVCACPRDRRT         |
| 2      | 24          | MAP2      | A172V                                     | EFHDQDELTPSTVEPSDQKEKESEK        |
| 3      | 25          | KCND2     | P358S                                     | EKGSSASKFTSISAAFVYTIIVTMTT       |
| 3      | 26          | MED12     | T1546M                                    | KLRLNLVGGMFDMVQRSTQQTTEWA        |
| 3      | 27          | ADAM28    | I184T                                     | DGVLWAHDLQNTALPATKLVKDKD         |
| 3      | 28          | ZNF843    | A92V                                      | APASPLGRSHSVGVVQGFSGQLCC         |
| 3      | 29          | GIMAP6    | G62S                                      | GSGKSATGNSILSRDVFESKLSTRP        |
| 3      | 30          | SDK1      | P772 frameshift                           | RLMLPEPPSAPPKYSYGQWAD            |
| 3      | 31          | PTCHD1    | K619E                                     | KNFTDMLRNSFLEAPQFSHFQEDII        |
| 3      | 32          | KRAS      | G12V                                      | MTEYKLVVVGAVGVGKSALTIQLI         |
| 3      | 33          | OR5H1     | M136T                                     | VAICKPLLYPAITTNGLCIRLLILS        |
| 3      | 34          | KMT2E     | I960 frameshift                           | FENISSPESSPEIETHL                |
| 3      | 35          | PKD1L1    | F164I                                     | ASCSMMRHSPLRIFVAGLVGALML         |
| 3      | 36          | MAOA      | S2649R                                    | PPGIMTQYGRVIHQPVGRIFFAGTE        |
| 4      | 37          | HRNR      | R424H                                     | GSGSGRSSSSGQQGSGLGESSGFH         |
| 4      | 38          | FGD5      | H2567Q                                    | ETDEDYIVVPRVLLREDEPKDEGSV        |
| 4      | 39          | ATF6      | P72L                                      | ELGYFTDTDELQMEANETAYENNFD        |
| 4      | 40          | CDH7      | F164S                                     | FKRLADMYGTGQGSLSYS               |
| 4      | 41          | C5orf42   | N19T                                      | LRWSQLPVKENKGFSGAAKSHFECCG       |
| 4      | 42          | KIF5B     | A406T                                     | KDITLTNDKPATTIGVIGNFTDAER        |
| 4      | 43          | ISL2      | G269E                                     | QQQOHSDKTSLQELTGTPLVAGSPI        |
| 4      | 44          | R3HDM4    | E12V                                      | MVALENPECGPVAAEGTPGGRLL          |
| 4      | 45          | ATG101    | R209L                                     | TDALGTSVTTTMLRLIKDTLAL           |
| 4      | 46          | PAPOLA    | A414D                                     | VGSLEKNEFITLDHVNQSPAPKE          |
| 4      | 47          | MPRIP     | L786V                                     | DAESKHSMSMFTVRGRYEEIEIRCVV       |
| 4      | 48          | HIST1H1E  | E42D                                      | AAKRKASGPPVSDLITKAVAASKER        |
| 5      | 49          | RC3H1     | Y890C                                     | RFGAISRTSKTICQGAGPMQAMAPQ        |
| 5      | 50          | ZBTB33    | R510Q                                     | VCKRSYVCLTSLQRHFNIHSWEKKY        |
| 5      | 51          | OR52E8    | R178C                                     | VFLLLRPFPCGHCIIPHTYCEHMG         |
| 5      | 52          | PRB3      | K235Q                                     | GKPEGPPSQGGNQPGPPHPGKPKQ         |
| 5      | 53          | C2CD2L    | R212C                                     | GEGLLISWAFDPCDLSLTVLPKLQ         |
| 5      | 54          | EVC2      | 294-294 deletion                          | DQMIDILSSEDPSMLQALELEIAT         |
| 5      | 55          | USP8      | R667H                                     | WAKFLDPITGTFHYHSPNTVHMY          |
| 5      | 56          | MYO19     | P550S                                     | YHTAGLVEKNKDSIPPELTRLLOQS        |
| 5      | 57          | MRPL39-1  | L189V                                     | VRAPEVPVLDSKVDEWMPKLENLRS        |
| 5      | 58          | MRPL39-2  | L189V                                     | GAFICYDVVLDSKVDEWMPKLENLRS       |
| 5      | 59          | PRDM15    | E580K                                     | CSATFLELQLLNKHLGHLEQAKSL         |
| 5      | 60          | C4B       | S1242W                                    | WGSVGTGSQSNVWPTPAPRNPSPDPM       |
| 6      | 61          | TMEM255B  | C151Y                                     | QTEVTCBSLDGKYQLKVRSNTCYCC        |
| 6      | 62          | PCDHGA3   | E523K                                     | TGVLYALRSFDYKQFRDLKLLVTAS        |
| 6      | 63          | PRAMEF11  | D67V                                      | PRRWKLQVLDLQVVCENFWMVWSEA        |
| 6      | 64          | FIGNL2    | Q474P                                     | AAPGAAEGARLLPAAFAAACRPPS         |
| 6      | 65          | PRR36     | L760Q                                     | ASAPLTPPLENQPSLAPPPLQTAS         |
| 6      | 66          | OLIG2     | S88A                                      | KSSSSSTSSSTSAAAASSTKDKKQ         |
| 6      | 67          | NUTM2F    | P559H                                     | VETSPPTAAQDHQGGQGRVRTGMAR        |

|    |     |           |                 |                              |
|----|-----|-----------|-----------------|------------------------------|
| 6  | 68  | C1orf21   | T75S            | LEKSSASSNVRLKSNKEVPLVHQPR    |
| 6  | 69  | PTGS2     | Q39H            | QNRGVCMSVGFHDHYKCDCTRTRTFYGY |
| 6  | 70  | CKAP4     | Q57P            | PPPAPHPPQHPQHPQNPQAHGKGGH    |
| 6  | 71  | WDHD1     | R369H           | DEDEDLMMASGHPRQRSHILEDDE     |
| 6  | 72  | ITGAM-1   | T486P           | LVLIGAPHYYEQPRGGQVSVCLPR     |
| 7  | 73  | ITGAM-2   | T486P           | PGPHRGPPLLRAAPRPGVVRVPLAQ    |
| 7  | 74  | RAVER1-1  | G65S            | PESLPEPTQPAPSSQPPGGSSKAFQL   |
| 7  | 75  | RAVER1-2  | G65S            | PESLPEPTQPAPSSQPPGGPWRWQQQ   |
| 7  | 76  | EYA2      | S100I           | PPPAQAYGIPSYIIKTEDSLNHSPG    |
| 7  | 77  | TRANK1    | V257L           | LHVVAAHSPGYLLKRQTEDVQMLLR    |
| 7  | 78  | ZKSCAN7-1 | G195R           | PPYDPGTHHLPSRDFGYCGI         |
| 7  | 79  | ZKSCAN7-2 | G195R           | PPYDPGTHHLPSRDFQAQCTSPVPTL   |
| 7  | 80  | DUX4L4    | Q378L           | QGSPWWGWRGPLVAGAWEPPQAGE     |
| 7  | 81  | TNXB      | R1081H          | TVTDRTSDSLHLLHWTVPPEGEFDSFV  |
| 7  | 82  | MUC12     | E2160D          | SPGSTTALSFGQDSTTFHSSPSTH     |
| 7  | 83  | KCNQ4     | A348V           | EKRMPAANLIQVAWRLYSTDMSRA     |
| 7  | 84  | MTERFD3   | Q192 frameshift | PVEKNKQMVRLRELSRRCRWL        |
| 8  | 85  | DMXL2     | T1644M          | AMGIGWVVRNINMLRRCIEKVAKAS    |
| 8  | 86  | OR2C1     | Y252C           | TCLSHLLVVFLLFCGSASYGYLLPAK   |
| 8  | 87  | UNC13D    | G1035S          | REVPGLSGSEEPSEVPQTRPLPTY     |
| 8  | 88  | SAMSN1    | R235H           | DDDGYPYSGPFCGHARVHTDFTPSPY   |
| 8  | 89  | AF035281  | T192M           | TPTTARTSGRSPMSAPSSLAACPRC    |
| 8  | 90  | FBXL18    | T546M           | RHLTLAQLPSVLMGSLVNLIGLQCQ    |
| 8  | 91  | OCRL      | G147E           | KLDTKDKPSVFSSELLGFEDNFSSMN   |
| 8  | 92  | ZNF182    | A6E             | MTPASESGEDSGSFYSWQ           |
| 8  | 93  | DTX3      | P2L             | MLILSSSGSKMAAC               |
| 8  | 94  | MAG       | A404T           | CVAENQYQGRATTFNLSVEFAPVLL    |
| 8  | 95  | PCDHGC5-1 | R816W           | EPDAIRSRNTLWERSQQAPPNTDW     |
| 8  | 96  | PCDHGC5-2 | R816W           | EPDAIRSRNTLWERSQVRGSAPPR     |
| 9  | 97  | RXFP3     | T179M           | YASVFFLTAMSVMRVHVSASALKSH    |
| 9  | 98  | KCNA10    | G49R            | PKGRPGGSSFSNRKILISESTNHET    |
| 9  | 99  | TRH       | R226W           | DDLRSRQGAEEKWQHPGRRAAWVRE    |
| 9  | 100 | C4orf48   | V85A            | GARARAEPAGSAAPAQSRPCVDCHA    |
| 9  | 101 | FPGS      | E429K           | CLEHQHWNHLDKEQASPDLSWAPS     |
| 9  | 102 | FXN       | C50S            | GRRGLRTDIDATSTPRRASSNORGL    |
| 9  | 103 | HPSE2-1   | E262D           | QFSNTYSNLLTDPNNYRTMHGRAV     |
| 9  | 104 | HPSE2-2   | E262D           | PGPDYLLKNYEDDPNNYRTMHGRAV    |
| 9  | 105 | HPSE2-3   | E262D           | SKKYNISWELGNDPNNYRTMHGRAV    |
| 9  | 106 | RAD9A-1   | T93M            | GQDLLRCKILMKMVEKCCISLNGRS    |
| 9  | 107 | RAD9A-2   | T93M            | LSVFRSLAMLEKMVEKCCISLNGRS    |
| 9  | 108 | OGFOD1-1  | V39L            | SDAVTEETLKKQLAEAWSRRTPFKV    |
| 10 | 109 | OGFOD1-2  | V39L            | SDAVTEETLKKQLAEAWSRRTPFVSH   |
| 10 | 110 | MUC12     | T1035A          | TTSHSSPGSTDTALLPASTTTSGPS    |
| 10 | 111 | NRK       | Q1252H          | DITKLIRRRPFRHIQVLEPLNLLIT    |
| 10 | 112 | ITIH6     | R523C           | PGKQELGIHLAACGPKDQLLVAHHS    |
| 10 | 113 | TFAP2E    | Q97P            | GGLAPLAQPQPPAAWAAPRAAARA     |
| 10 | 114 | ATPAF1    | D84G            | VRPGSGRPEGGAGSSGVGAELQA      |
| 10 | 115 | MUC5B     | T2445P          | PGTTWILTELTPATTTESTGSTAT     |
| 10 | 116 | POU5F1P3  | G59R            | IGPGFPGSEEWRIIPCPPPYFCG      |
| 10 | 117 | FAM71E2   | R480L           | PSQKAPAIPAPSLKASAASASPRKA    |
| 10 | 118 | FAM134A   | L67R            | TLWLRLRGWEAVRAAAQRLLVWEKP    |
| 10 | 119 | KCNIP3    | A210T           | MGRHTYPILREDTPAEHVERFFEKM    |
| 10 | 120 | PCDH10    | R230H           | GGGAGLPPQQOHTGTALLTIRVLD     |
| 11 | 121 | ATPAF1    | E93A            | GGADSSGVGAEEAALQANPFYDRYRD   |
| 11 | 122 | SERPING1  | D30A            | AGSEAGWLRSAAVAAQMASRLTLL     |
| 11 | 123 | LEPREL2   | L60R            | YAAGAWAPAVALRREALRSQAALGR    |
| 11 | 124 | SLC25A35  | V114G           | PARSAAAGAMAGGMGAYLGSPIYMV    |
| 11 | 125 | HIPK4     | R603P           | LPPRRSHQHGGPPPGATSFLQHVTHG   |
| 11 | 126 | IQCJ      | K146T           | QLARPTGFIHTLTPQIERLGFLLTL    |
| 11 | 127 | CIZ1      | Q578L           | FCYICKASCSSQLEFQDHMSEPPHQH   |
| 11 | 128 | VCX       | M180K           | SQVEEPPSQESEKEELPSV          |
| 11 | 129 | CROCC     | L1066Q          | LLAESEKQALSQKSEKTLALSEKL     |
| 11 | 130 | GJB4      | D142V           | TYLLSLIFKAAVVAGFLYIFHRLYK    |
| 11 | 131 | TNNT3-1   | V26A            | EEEEEAQEEAAEAHEEEKPRPKLT     |
| 11 | 132 | TNNT3-2   | V26A            | EEEEEAQEEAAEAHEEDTAEEDAEE    |
| 12 | 133 | TNNT3-3   | V26A            | EEEEEAQEEAAEAHEEGMRTQDFHH    |
| 12 | 134 | HOXA3     | L90Q            | PPSQPPSLGEPHQHPPPPQAAPPAP    |
| 12 | 135 | FEM1A     | D257A           | AGGEAQPGLPQEAPESTSQGCAQPGG   |
| 12 | 136 | DMD-1     | I106R           | GNHKLTLGLIWNRLHWQVKNVMKN     |
| 12 | 137 | DEAF1     | A388V           | NQAQQLKTLFEQVKHASTYREAAATN   |

|    |     |           |                  |                                                                     |
|----|-----|-----------|------------------|---------------------------------------------------------------------|
| 12 | 138 | ZNF705E   | F271Y            | DNSGKAFSQSSGYRGNKIHTGKPK                                            |
| 12 | 139 | CABP1     | H88P             | AAAASGGSRAPRPGPARDPGLPSRR                                           |
| 12 | 140 | CCER1     | D10A             | MTQTLDTREAPLNLGGGGGGGC                                              |
| 12 | 141 | SMARCE1   | M103L            | LKLWEIGKIIGGLWRDLTDDEEKQEY                                          |
| 12 | 142 | UBE2Z     | D107G            | RTAPQCLLRIRKRGIMSIYKEPPPGM                                          |
| 12 | 143 | ARHGAP15  | I159N            | AKEKSSRKNVFQNTTVSGNEFLLQS                                           |
| 12 | 144 | PCNT      | S2667R           | LESEQKGRALQRQLEEEQLRHLLQR                                           |
| 13 | 145 | ZNF451    | S853T            | ERKLLKQAINYSKTLDMKGVENDLS                                           |
| 13 | 146 | TNNT3-4   | V26A             | EEEEEAQEEAAEAHEEVHEPEEVQE                                           |
| 13 | 147 | GLI3      | P942A            | KAKYAAATGGPPATPLPNMERMSLK                                           |
| 13 | 148 | TNRC18    | E60A             | GLYPSYLHLNHLAPPSSGSPLLSQL                                           |
| 13 | 149 | DISP1     | E473D            | GESMMNIYLDNFDNWNSSDGVTTIT                                           |
| 13 | 150 | PRR35     | S358P            | LPKASPSLTRFCPRSSLPTGSSVML                                           |
| 13 | 151 | ADAT1     | A354 frameshift  | QRALIGRCQNVSLLYQKASEFKN                                             |
| 13 | 152 | RSAD1     | N26T             | AARAAQRRRRVETAGGSPSPPEAGR                                           |
| 13 | 153 | TEX14     | L105F            | VHAAAFSGNQWIFSKLLDAGGLRL                                            |
| 13 | 154 | KCNH6     | V110G            | YYRKDASSFRCLGDVVPVKNEGDGAV                                          |
| 13 | 155 | USP36     | P234A            | KACLNGCAKCVLAHPPSQGFHLY                                             |
| 13 | 156 | CTDP1     | V43G             | RLEWRV AAGAAGRIGSVLAVFEAA                                           |
| 14 | 157 | RPS15     | R16Q             | EQLMQLYSARQRQLNRGLRRKQHS                                            |
| 14 | 158 | TNNT3-5   | V26A             | EEEEEAQEEAAEAHEEVHEPEEKPR                                           |
| 14 | 159 | SFT2D3    | L153R            | APSRPALLYMAARGATLFAALGLRS                                           |
| 14 | 160 | CCM2L     | G210A            | ICSLDWRMGWGGAAAEARAGGGGGG                                           |
| 14 | 161 | PKDREJ    | L139Q            | TWSVRLPRSPGRQAWAFRLRLGPG                                            |
| 14 | 162 | RPL34     | Q114L            | IVVKVLKAAQASLKAK                                                    |
| 14 | 163 | TRAPPC3L  | K92 frameshift   | IGITFLKKRDEKNI                                                      |
| 14 | 164 | AKAP12    | E24A             | PEQPPEGSSTPAAPEPSGGGPSAEA                                           |
| 14 | 165 | PEX6      | L81R             | PGPPQLVSRALRRLLALGSGAWVR                                            |
| 14 | 166 | WDR86     | Q407P            | AAGLIPRGPCRRPPRHPAAPRAPRP                                           |
| 14 | 167 | TNNT3-6   | V26A             | EEEEEAQEEAAEAHEEVHEPEDDLK                                           |
| 14 | 168 | DMD-2     | I106R            | GNHKLTLGLIWNRLHWQVLGDRWA                                            |
| 15 | 169 | GDPD2     | L441Q            | DLPLLDIKDRFLQPAQAGLKLLASS                                           |
| 15 | 170 | AIM1L     | Q562L            | KGPGAPAASSPTLKEVVQSGGAPAA                                           |
| 15 | 171 | SERINC2   | D343A            | LLCTLFISLRSSAHRQVNSLMQTEE                                           |
| 15 | 172 | C11orf65  | K110M            | ANSPRNYAKLPAMHTSHNKNDHLQE                                           |
| 15 | 173 | UHRF1BP1L | D844V            | ESLILLSENLRKVVEAVTGSPASQT                                           |
| 15 | 174 | PKP2      | D26G             | RTVLGQQILGQLGSSSLALPSEAKL                                           |
| 15 | 175 | SMARCD1   | Q46H             | PGPPVRMGPAAGHGLYRSPMPGAAY                                           |
| 15 | 176 | KCNK13    | D384H            | NGCPHQTSTLARHNEFSGGVGAFAI                                           |
| 15 | 177 | SLC12A1   | L553P            | NNEPLRGYILTFPIAMAFILIAELN                                           |
| 15 | 178 | SMAD6     | F2L              | MLRSKRSGLVRRLLW                                                     |
| 15 | 179 | SSTR5-AS1 | P39T             | MRLRTPKPRPRTRPHAAADPRPRP                                            |
| 15 | 180 | YBX3P1    | Q41P             | PATKSRVGGGAPPAAPAPAALVAG                                            |
| 16 | 181 | MSLNL     | L326Q            | GANLWASANCSLQQGFWCQPASQLP                                           |
| 16 | 182 | SARM1     | C518S            | TAAREMLHSPLPSTGGKPSGDTDPV                                           |
| 16 | 183 | RUNDC3A-1 | F73L             | FAAILEQILSHRLKACAPAGVSWF                                            |
| 16 | 184 | RUNDC3A-2 | F73L             | FAAILEQILSHRLKGPVSWFSSDQG                                           |
| 16 | 185 | HID1      | S675R            | WREQRRPSTSSARGQWSPTPEWVLS                                           |
| 16 | 186 | OSBPL1A   | A216D            | LKNKNDQKPLDLDDQGAEMKHILVGN                                          |
| 16 | 187 | NLRP13    | C270Y            | FQQRFSYVFYLSYHKIRYMKETTFA                                           |
| 16 | 188 | KANK3     | L224R            | EQVRALRAEKARRLAGRAQPEPDGE                                           |
| 16 | 189 | GRB14     | R48Q             | AHDLAPAPWLHAQALLPLPDGTRGC                                           |
| 16 | 190 | SPEG      | L2525Q           | AQAGATTPSAESQSEASATSGSSA                                            |
| 16 | 191 | TRPC4AP   | Q56L             | GQLTGRGLVRAVLFETFLTERDKQ                                            |
| 16 | 192 | MPST      | S9P              | MAEPGSREPETRARSPSVAAM                                               |
| 17 | 193 | ZNF662    | E17A             | ALASGTRLGLVLALLPGQPALPRAR                                           |
| 17 | 194 | ADAMTS2   | 23-24 deletion   | LLCPALLLLLLPPPLPPPPPPAN                                             |
| 17 | 195 | AMZ1      | E287A            | LRCLMQGALSLDAALRRPLDLCPIC                                           |
| 17 | 196 | PDLIM2    | H284P            | PASRALATPPKLPCEKCEKSTSIANQ                                          |
| 17 | 197 | NKX3-1    | E61A             | QRORDPEPEPEPAPEGGRSAGAQN                                            |
| 17 | 198 | CEBPD     | S191R            | EKSAGKRGPRDRPEYRQRRENNI                                             |
| 17 | 199 | SGK223    | L1188H           | PCSSAAPPAGGTHSPAAGPASPEGP                                           |
| 17 | 200 | ZNF462    | P582T            | PPHQVPPQPQTQTPTQPQPPTQA                                             |
| 17 | 201 | ARID1A    | L1051 frameshift | TNLPAVGRKPLDLLSPLCVCEGDWWIDSGQQEQ<br>KMAGTCNQPCGHIKQCCOLLEKAVYPSLCL |

Supplementary Table 2. 4095 tandem minigene (TMG) library

| TMG ID | Minigene ID | Gene name | Position and change of mutated amino acid | Mutated amino acid sequence |
|--------|-------------|-----------|-------------------------------------------|-----------------------------|
| 1      | 1           | KLF5      | P309A                                     | ATYFPPSPSSSEAGSPDRQAEMLQN   |
| 1      | 2           | ZC3H3     | T840P                                     | HGPRKPSASQRPPRQTPSSAALTA    |
| 1      | 3           | WRNIP1    | L12I                                      | MEVSGPEDDPFISQLHQVQCPVCQ    |
| 1      | 4           | SENP2     | G262R                                     | LKTKGWGEEQNHRVKTTOFVPKQYR   |
| 1      | 5           | UGT8      | K128N                                     | LMVGNHALIQGLNKEKFDLLLVDPN   |
| 1      | 6           | WWC1      | K671N                                     | ATRIQIALKYDENNKQFALIIQLS    |
| 1      | 7           | PEX1      | Q79E                                      | SDQGENVAEINREVQKLGLSNGGQ    |
| 1      | 8           | KRAS      | G12D                                      | MTEYKLVVVGADGVGKSALTIQLI    |
| 1      | 9           | ROBO2     | P929T                                     | GDPSYPWLADSWTATSLPVNNSNSG   |
| 1      | 10          | PGBD1     | E656K                                     | VRATGTIRENRTKKCPLMNVEHMKK   |
| 1      | 11          | PLEC      | L3602M                                    | KGLVLRQHGIIRLMEAQIATGGIIDP  |
| 1      | 12          | ESRRA     | P173L                                     | YKRRPEVDPLPFLGPPFAGPLAVAG   |
| 2      | 13          | LIX1L     | G121W                                     | QMKQSRGADLKNWALVYEMVPSNS    |
| 2      | 14          | TACC2     | A677T                                     | EEDPVLPPVPDGTGEPTVPEGAIWE   |
| 2      | 15          | KDM2A     | A507S                                     | LLEELANSDPKLSLTGVPIVQWPKR   |
| 2      | 16          | KCNH2     | E435D                                     | VFTPYSAAFLLKDTTEGPPATECGY   |
| 2      | 17          | PCSK5     | R1302H                                    | FFFLLRSKGECHEHSCPDHYVEQST   |
| 2      | 18          | KCNN3     | D711Y                                     | SVAVGTTHTPISYSPIGVSSTSFPT   |
| 2      | 19          | DNAJB6    | N248T                                     | DALAEERMRRGQTALPAQAPGLRPP   |
| 2      | 20          | FAM109A   | Q151P                                     | QSHPCLLPQPRSPPCPCPAGVPVSR   |
| 2      | 21          | DDX60     | L101I                                     | DAEYAYFNPELISLRTALILHLQK    |
| 2      | 22          | DUOX2     | K529N                                     | YWFENTRNGLFSNKEIEDIRNTTLR   |
| 2      | 23          | COL17A1   | W455G                                     | GAGGGPWGPAPAGCPCGSCCSWWKW   |
| 2      | 24          | WISP1     | M32K                                      | VLATALSPAPTTKDFTAPLEDTSS    |
| 3      | 25          | AGAP3     | H576P                                     | SSSPKLDPPSPSPSNRKKHRRKKST   |
| 3      | 26          | ZC3H3     | T493P                                     | ALRGKSSPVLKPPNKGLVQVTTHR    |
| 3      | 27          | C8orf82   | V165G                                     | RLYHPAPERAGGGGLVRSALAFELS   |
| 3      | 28          | LINC00115 | L16H                                      | VFHRPHRPSWPHRAALGFGRQSS     |
| 3      | 29          | TRIM11    | H123L                                     | CAACERSGEHWALRVRPLQDAAEDL   |
| 3      | 30          | CPEB3     | R544L                                     | DRPKTIFVGGVPLPLRAVELAMIMD   |
| 3      | 31          | PRB1      | R558L                                     | POGPPPOGGNRPLGPPPGKPOGPP    |
| 3      | 32          | PRG4      | L1016F                                    | AGGAEGETPHMLFRPHVFMPEVTPD   |
| 3      | 33          | HLA-DQB1  | S229R                                     | TVEWRAQSESAQRKMLSGVGGFVLG   |
| 3      | 34          | ZNF717    | V114L                                     | GICHRSLVELQEL               |
| 3      | 35          | MUC4      | D1125Y                                    | VSTGHTTPLPVTYTSSASTGHATS    |
| 3      | 36          | MCHR2     | N116T                                     | PLCTIITSLDCTQFACSAIMTVMS    |
| 3      | 37          | OBSCN     | R4668W                                    | WHKGMERIQGGWFEVVSQGRQOQML   |
| 4      | 38          | DSPP      | S845R                                     | SNSSDSSDSSNSRSDSSDSSDSDGS   |
| 4      | 39          | ADAMTSL2  | R420W                                     | EQAGGGACEGPPWKGFRDRNVTGT    |
| 4      | 40          | RSAD2     | F248L                                     | QIKALNPVRWVKVLQCLLIEGENCGE  |
| 4      | 41          | AEBP1     | P387R                                     | EEWTPTEKVKCPRIGMESHRIEDNQ   |
| 4      | 42          | AKAP6     | D1033Y                                    | EALKKGGVLLPNYLLEKVDSENEKW   |
| 4      | 43          | TMEM132D  | T394M                                     | SSSMGLMEGRGTMTRDRILOKQKKGQ  |
| 4      | 44          | DPY19L2   | S598P                                     | FEKVIFGILTVMPIQGYANLRNQWS   |
| 4      | 45          | ARL14EPL  | A65S                                      | DFNPETRQKKKSRMSKMNEYFSTK    |
| 4      | 46          | SPTB      | V445M                                     | MRETWLTSENQRLMAQDNFGYDLAAV  |
| 4      | 47          | PPM1K     | V194M                                     | NCAWSAALDLEPMDTICGASVEREI   |
| 4      | 48          | TTN       | D4157E                                    | SWFKDGGKEIAASERYRIAFVEGTAS  |
| 4      | 49          | IL17F     | R72H                                      | GIINENQRVSMHNIERSRSTSPWNY   |
| 5      | 50          | FRMPD1    | T1562M                                    | SVKLLARQCTALMAAVFCLTQKFRA   |
| 5      | 51          | LRFN5     | R516H                                     | GCIQFTTEQDYVHCHFMQSQFLGGT   |
| 5      | 52          | ANKRD18B  | S397L                                     | NEEMITKKVAQYLQQLNDLKAENAR   |
| 5      | 53          | NPC1L1    | R242C                                     | GSGIQPLNEGVACCNESQGGDVATC   |
| 5      | 54          | PCDHB3    | E320K                                     | NFEAINSYEVDIAKADGGGLSGKST   |
| 5      | 55          | LRRC4     | S147Y                                     | LTVIPSGAFEYLKRELWLRNPNPI    |
| 5      | 56          | MAGI2     | R136C                                     | ELQIIRDNLVLCVPCPTRPHKEG     |
| 5      | 57          | LMOD1     | P521T                                     | PKPSPQSPKSTKNSPKKGGAPAA     |
| 5      | 58          | ZNF853    | V457M                                     | ELMVLPAVAAPAMVAIPGPAGSAAL   |
| 5      | 59          | TENM3     | V17F                                      | APDPGNLAAALGFSFPHGHSEGAPROE |
| 5      | 60          | MYO1G     | D488V                                     | GTITDRIFLQTLVMHHRHHLHYTSR   |
| 5      | 61          | SYT7      | M256L                                     | TTSQSLGQLQAHLASAPGNPRAYG    |

Supplementary Table 3. 4112 tandem minigene (TMG) library

| TMG ID | Minigene ID | Gene name | Position and change of mutated amino acid | Mutated amino acid sequence                                       |
|--------|-------------|-----------|-------------------------------------------|-------------------------------------------------------------------|
| 1      | 1           | STS       | V215 frameshift                           | LNCLGLLHVPLGVFFQPSLPPSSPNPDPFLGLPSLLP<br>APELLHDEELRDHSAAHVL      |
| 1      | 2           | HEPH      | S881R                                     | TLFTVFSRTEHLRPLTVITKETEKA                                         |
| 1      | 3           | POLA1     | D105Y                                     | EIFDDDDLEDDALYADEKGKDGKARN                                        |
| 1      | 4           | COL4A5    | G902R                                     | GFPGTKGEMGMMRPPGPPGLGIPG                                          |
| 1      | 5           | SEC23B    | Q152 frameshift                           | EEDDLQALKESLRCP                                                   |
| 1      | 6           | USP34     | Q1495K                                    | SWSCKFVAAGGLKQLEIFNSGILE                                          |
| 1      | 7           | RBM41     | G210D                                     | MKKRLEEFQLMRDEPFASHLSVSAT                                         |
| 1      | 8           | NAA35     | D139Y                                     | QTVFTCLYIHNPYFIEDPAMKAFAL                                         |
| 1      | 9           | VPS13A    | G1333V                                    | SGVTTNASHHSGVATVVTAAVVEVH                                         |
| 1      | 10          | TJP2      | G904V                                     | DSRLISDFEDTDVEGGAYTDNELDE                                         |
| 1      | 11          | KIAA2026  | V1464A                                    | TRSEATAATNGDAISGTPVQKMLLV                                         |
| 1      | 12          | SETX      | G2567R                                    | LWDPQPSSPQHPRATPPTGEPGFPV                                         |
| 1      | 13          | DNM1      | P756L                                     | DINTTTVSTPMLPVDSDWLQVQSV                                          |
| 2      | 14          | C5        | G836R                                     | FLEMNIPYSVVRREQIQLKGTVYNY                                         |
| 2      | 15          | STK3      | V220L                                     | TVIGTPFWMAPELIQEIGNYCVADI                                         |
| 2      | 16          | CRISPLD1  | T12S                                      | MKCTAREWLRVSTVLFMARAIAPAM                                         |
| 2      | 17          | PRKDC     | A1942S                                    | NQLLERRRLYHCSAYNCAISVICCV                                         |
| 2      | 18          | OPLAH     | P869S                                     | ADIGGITPGSMPSHSTMLQQEGAVF                                         |
| 2      | 19          | OPLAH     | P143L                                     | RRHRGHHTRLHALPLHHAATGGCRL                                         |
| 2      | 20          | PLEC      | E4084K                                    | AQIATGGIIDPEKSHRLPVEVAYKR                                         |
| 2      | 21          | RIMS2     | R479T                                     | RKTREKREMETMLTNDLSSDQSESV                                         |
| 2      | 22          | DCAF13    | E192G                                     | YDPALHPFEVPRGYRALNATKLER                                          |
| 2      | 23          | PTCD1     | I625N                                     | MKQNRVPVNEVVNRQLEFAAQYPPT                                         |
| 2      | 24          | ARPC1A    | S201I                                     | MPFQQLMSEFGGIGTGGVWHGVSEFS                                        |
| 2      | 25          | TRRAP     | A2809T                                    | MDKAKKEHERSNTSPAIFPEYQLWE                                         |
| 2      | 26          | DLX5      | E204Q                                     | IKKIMKNGEMPPQHSPPSSDFMACN                                         |
| 3      | 27          | CALCR     | R454P                                     | QFKIQWNQRWGRPPSNRSARAAAAA                                         |
| 3      | 28          | AKAP9     | V1990D                                    | RQKEAMKAEAGPDEQQLQETEKLM                                          |
| 3      | 29          | STEAP2    | P260T                                     | YKIPIEIVNKTLTIVAITLLSLVYL                                         |
| 3      | 30          | DMTF1     | R569K                                     | TSDNVTVQCHTPKVIIQTVATEDIT                                         |
| 3      | 31          | SUMF2     | K308N                                     | SAIPSSRASASGNNFPFVSHPSVA                                          |
| 3      | 32          | ADCY1     | Q1019H                                    | SRMDSTGVQGRIVTEEVHRLLRRC                                          |
| 3      | 33          | TAX1BP1   | M527T                                     | DFDIVTKGQVCETTKEIADKTEKYN                                         |
| 3      | 34          | CDC47L    | A216T                                     | MPDFFPVRTPTSTSRKKTVRRAFSE                                         |
| 3      | 35          | REPIN1    | G285V                                     | PRGRPAVTAPRPVGDVDRPFQCAC                                          |
| 3      | 36          | ZNF282    | WD339-340CY                               | LSRIKQEEHQVCVYQQDLADRDIPDT                                        |
| 3      | 37          | KIAA1244  | C1357F                                    | QVFANAATSYMFLMKFVKGLGEVD                                          |
| 3      | 38          | MET       | G643V                                     | NKHFNMSIIISNVHGTQYSTFSYV                                          |
| 3      | 39          | TRIP6     | G210V                                     | PHFPLPGRGEVWVPGYRSQREPGPG                                         |
| 4      | 40          | ORC3      | G477D                                     | YYLKNEALKSEEDCIPNIAPDICIA                                         |
| 4      | 41          | SYNCRIP   | R412T                                     | RGGRGARGAAPSTGRGAAPPRGRAG                                         |
| 4      | 42          | DST       | D31A                                      | LQAYEDVLERYKAERDKVQKKTFTK                                         |
| 4      | 43          | ZNF445    | G491 frameshift                           | HTVGVSVFKSCDCEGLSVIAPILRIIRDFTLKRKHLN<br>VGCVKGKPSGGVPTVRGMRKFTLE |
| 4      | 44          | PSTPIP2   | S330C                                     | PDDPNYSLVDDYCLLYQ                                                 |
| 4      | 45          | DST       | L1606F                                    | DTSATHREVQRKFDHATDRFRSLYS                                         |
| 4      | 46          | GCLC      | R128L                                     | EFNTVEANMRKRLKEATSILEENQA                                         |
| 4      | 47          | TMEM63B   | N186Y                                     | LPVNFSGDLLENYAYSFGRTTIANL                                         |
| 4      | 48          | CNPY3     | V55L                                      | VRLPSKCEVCKYLAVELKSAFEETG                                         |
| 4      | 49          | ULBP3     | A223S                                     | PPTMAPGLAQPKSIATTLSPWSFLI                                         |
| 4      | 50          | HIVEP2    | D20N                                      | LGQKATSRSGETNKASGRWRQEQSA                                         |
| 4      | 51          | SLC37A3   | R9I                                       | MAWPNVFQIGSLLSQFSHHHV                                             |
| 4      | 52          | SLC39A1   | T130A                                     | MGFFLVLVMEQIALAYKEQSGSPSL                                         |
| 5      | 53          | PAK1IP1   | D304H                                     | TNARLTCLGVWLHKVADMKESLPPA                                         |
| 5      | 54          | AIM1      | E1034G                                    | GKVVIIYSEPDVSGKCIEVFSIDIQC                                        |
| 5      | 55          | ZFYVE16   | F1118L                                    | NEDTIPKDIFRLLITIIYKDALKGKY                                        |
| 5      | 56          | SKP2      | H171L                                     | DGTLQLLKEALPLLQINCSHFTTIA                                         |
| 5      | 57          | RAI14     | G402C                                     | TQTDLGPPLGKPCETSPDPSKSSPS                                         |
| 5      | 58          | TARS      | V587L                                     | YVSHDGGDDKRPLIVHRAILGVSER                                         |
| 5      | 59          | GOLPH3    | G32V                                      | RNAADKERAAGGVAGSSEDDAQRR                                          |
| 5      | 60          | KDM3B     | G334V                                     | GPWKGGNASGEPVLDQRAKQPPSTF                                         |
| 5      | 61          | SNX2      | F369L                                     | EVGRFEKERVKDLKTVIIKYLESLV                                         |
| 5      | 62          | DMXL1     | R1069K                                    | LAVAYKQPASNSKSSQDFVMHVSIF                                         |
| 5      | 63          | MARCH6    | R690S                                     | AACGLYVCWLTISAVTVMVAWMPQG                                         |
| 5      | 64          | NFXL1     | C486F                                     | RDCQKHQCRKCFPGNCPDQNCG                                            |
| 5      | 65          | ATP10D    | E853A                                     | TLCIAKKVMSDTAYAEWLRNHFLAE                                         |

|    |     |          |             |                                                          |
|----|-----|----------|-------------|----------------------------------------------------------|
| 6  | 66  | ATP8A1   | K27N        | AEGYEKTDVSENSTLADQEEVRTI                                 |
| 6  | 67  | HTT      | D1056Y      | GWHCGVPPLSASYESRKSCTVGMAT                                |
| 6  | 68  | GPR125   | G320R       | ALTISNIQAGSTRNWGCHVQTKRGN                                |
| 6  | 69  | FAM198B  | K399E       | RLDTNCCGFRPREEDACVQNGLRPK                                |
| 6  | 70  | KIAA0922 | P1439L      | ENGVPCVIQESALVHNSFIDWSATC                                |
| 6  | 71  | NAA15    | I658V       | KLAKVETPLEEAVKFLTPLKNLVKN                                |
| 6  | 72  | FAT4     | S1402P      | ITAKDQGRPPRSPTMSVVIHVRDFN                                |
| 6  | 73  | ALPK1    | N1103S      | YVTEFNKRLYEQSIPTQIFYIPSTI                                |
| 6  | 74  | ALPK1    | E554D       | SDAFRVSLDQDQDVTETEPSDYSNGE                               |
| 6  | 75  | SETD5    | E650K       | AQQAELSQLALEKGGNSLVTPTEA                                 |
| 6  | 76  | PPM1M    | G128E       | RLLGTLAVSRGLEDHQLRVLDTNIIQ                               |
| 6  | 77  | COL7A1   | R185L       | VGIKNADPEELKLVASQPTSDFFFF                                |
| 6  | 78  | DST      | D209A       | LDPAERAVLRIAAERDKVQKKTFTK                                |
| 7  | 79  | PARL     | S163G       | FRKEINKWNNLGDGQRTVTGIIAA                                 |
| 7  | 80  | ITSN1    | G783S       | GEWVDESQTGEPWSLGGELKGGTGW                                |
| 7  | 81  | PARL     | A284S       | GMILGWKFFDHASHLGGALFGIYWV                                |
| 7  | 82  | TTC14    | S134I       | DIERGDIVIGRIISIREFGFFMVL                                 |
| 7  | 83  | TBC1D5   | G363C       | VWDALFADGLSLCLVDYIFVAMLLY                                |
| 7  | 84  | ZBTB38   | Y709F       | SNSSENAASVISFSGSAPSIVHSS                                 |
| 7  | 85  | DNAJC13  | L877I       | PKVNMKCLCLQAIIVYGRCHEEIG                                 |
| 7  | 86  | GOLGB1   | V1076L      | EIYLKQTISEKELELQHIRKDLEEK                                |
| 7  | 87  | GOLGB1   | V3175M      | LRKLEEERDQRMAENALSVAAEQ                                  |
| 7  | 88  | WDR52    | E584K       | KPHTACVTALAYKRDGEILATGSKD                                |
| 7  | 89  | RIBC2    | T204S       | DEAKHLQKLESSTRKAVCASVKDF                                 |
| 7  | 90  | MKL1     | S318F       | PPVHSLSTTNSFSSGAPGPCGLAR                                 |
| 7  | 91  | SF3A1    | A771S       | YEGIFIKDSNLSYYNMANGAVIHL                                 |
| 8  | 92  | MTMR3    | R728S       | EGKEDPILLEKESRKTPEASAIGLH                                |
| 8  | 93  | GUCD1    | L118M       | DSEFERALQKLQMTRSIWTIDLAYL                                |
| 8  | 94  | BCR      | K293T       | SIYVGGMMEGEGTGPLLRSQSTSEQ                                |
| 8  | 95  | TRPM2    | V1477L      | HACDSGASIRWQLVDRRIPLYANHK                                |
| 8  | 96  | C2CD2    | G43W        | PEMAVNIQPKALWEDQVAETSAMSD                                |
| 8  | 97  | PARL     | S163G       | FRKEINKWNNLGDGQRTVTGLC                                   |
| 8  | 98  | ITSN1    | G741S       | IVMVDESQTGEPWSLGGELKGGTGW                                |
| 8  | 99  | ATP5J    | F17L        | GGISMILQRLFRLSSVIRSAVSVHL                                |
| 8  | 100 | CSE1L    | L340M       | PHYKNLFEDQNTMTSICEKVIIVNM                                |
| 8  | 101 | SAMHD1   | D435Y       | TDNIFLEILYSTYPKLDAREILKQ                                 |
| 8  | 102 | NDRG3    | G128V       | SLKSIIGIGVGAAYILSRFALNHP                                 |
| 8  | 103 | AAR2     | S187C       | GQNLPRCGIECKCYQEGLARLPKMK                                |
| 8  | 104 | RBM12    | H325Y       | FSAMENDVRDFFYGLRVDVAHLLKD                                |
| 9  | 105 | CEP250   | L1519P      | EENHHKMECQKPIKELEGQRETQR                                 |
| 9  | 106 | PSMD10   | Stop loss   | IQDTEGNTPLDTPVPMRREWKKQNCWCPKEQV<br>FTLRIKKKRHPCKWPKVAWV |
| 9  | 107 | PTCD3    | G213V       | QEPSTDYHFQQTQVQSEALEEENDET                               |
| 9  | 108 | CDTN1    | A419T       | QQRERLQEELSQTTESTIDELKEQVD                               |
| 9  | 109 | EHBP1    | T165P       | SLSCIFLREGKAPDEDMQSLASLMS                                |
| 9  | 110 | MID2     | C734S       | PQESPYVSGMKTSH                                           |
| 9  | 111 | BIRC6    | M2155I      | DNLLSPLQPQLPIHRRTEGVLDIPM                                |
| 9  | 112 | LRRFIP1  | T437A       | EAAVTQVEEQAGAVASCPLGHSDDT                                |
| 9  | 113 | USP40    | G1060E      | RTDRQPLREYKLERRIEICLEPLQK                                |
| 9  | 114 | CHPF     | E313K       | SHLELSPGEPVQKGDPHFRSALTAH                                |
| 9  | 115 | TNS1     | Y366F       | VGHTQGPLDGLSLFAKVKKKDSLHGS                               |
| 9  | 116 | ABCA12   | L1290I      | TYGMAAPWYFPIPSYWKERFGCAE                                 |
| 9  | 117 | ZDBF2    | G1986W      | QDDRKTKKKVKIWTVEFPASCTKVL                                |
| 10 | 118 | ALS2     | M689I       | KDSYLALVDKNIIGYIASLHELATT                                |
| 10 | 119 | TRAK2    | R795Q       | HSPPSPLPFEPQVHLSNFLASRP                                  |
| 10 | 120 | SPATS2L  | T27N        | SGTLLWIPRAYSNRSKMAELNTHVN                                |
| 10 | 121 | WDR75    | R228C       | DCIASGHMDGKICLWRNFYDDKKYT                                |
| 10 | 122 | DHRS9    | D286G       | SLFPKTHYAAGKGAKIFWIPLSHMP                                |
| 10 | 123 | TTC21B   | A1012S      | GKLEDVPRFFSMSEKRNSRAKLEPG                                |
| 10 | 124 | GCA      | A62P        | AGDSVYTYFSAVPGQDGEVDAEELQ                                |
| 10 | 125 | NBAS     | C144S       | KPQWRRVAWSYDSTLLAYAESTGTV                                |
| 10 | 126 | NBAS     | V2177F      | ESSHHEAEFQHLFLLQAWPPMKSE                                 |
| 10 | 127 | NEB      | D3056G      | QLGHHIGARNIEGDPKMMWSMHVAK                                |
| 10 | 128 | NEB      | K6202M      | VNSELYKETYEMQKGYLAGKVVIG                                 |
| 10 | 129 | PTPN18   | G317L       | GRVPADQSPAGSLAYEDVAGGAQTG                                |
| 10 | 130 | POTEF    | WD779-780CY | LKYPMEHGIITNCYDMEKIWHHTFYN                               |
| 11 | 131 | ZNF584   | C244F       | HQKVHTGIKPFKFSDCGKTFNRKDA                                |
| 11 | 132 | ZNF587B  | R412G       | KGNLILHQHGHTGKRPYMCWECKGL                                |
| 11 | 133 | PTPRH    | S44I        | PGRNLTVETQTTISISLSWEVPDGL                                |
| 11 | 134 | POLD1    | L546V       | EMARVTGVPLSYVLSRGGQVQVVSQ                                |
| 11 | 135 | NR1H2    | Q164L       | PLGLGLPLVDLRLAARAPGKARVSS                                |

|    |     |          |                   |                            |
|----|-----|----------|-------------------|----------------------------|
| 11 | 136 | CYTH2    | A81S              | ENELLQNTPEEISRFLYKGEGLNKT  |
| 11 | 137 | ZNF114   | Y342N             | EECGKVIRESSKNTHIRSHTGEKPY  |
| 11 | 138 | KCNN4    | G50V              | GLMVLHAEMLWFGCSWALYLFLVK   |
| 11 | 139 | PALMD    | A45T              | EDKLLKHQHLKKKTLREKWLLDGISS |
| 11 | 140 | PHLDB3   | A232S             | QEMREQLDVAQRSYEDLEFQQLERE  |
| 11 | 141 | C19orf47 | G234V             | LQYAGVLKKGGRVPAKASPQPALTV  |
| 11 | 142 | ACTN4    | G68S              | FTAWCNSHLRKASTQIENIDEDFRD  |
| 11 | 143 | YIF1B    | DP19-20EL         | KRRIPVSPQGMaelHQLFDdtSSAQs |
| 12 | 144 | SUGP2    | E905D             | EEDEDEDEDGGEDAPAPGGAGKSEG  |
| 12 | 145 | COLGALT1 | M233T             | RKRDRRGCFVPTVHSTFLIDLKKA   |
| 12 | 146 | ANKRD12  | T1727I            | KVELEENAEDDKIENQIPQRMTRNK  |
| 12 | 147 | RBFA     | G232V             | LWSTKGGKIKGSVAWCGRGRWLS    |
| 12 | 148 | ZNF516   | R424L             | PVNSYQAWQLATLGKVAEPAEYLKY  |
| 12 | 149 | PIGN     | P579L             | MLTAGLTAFAAWLFLTRLWTRAKMT  |
| 12 | 150 | CCDC53   | V47A              | VHTVQFLNRFSTACEETGSHFVTHA  |
| 12 | 151 | PIK3C3   | R572K             | QRESGNRKKKNEKLQALLGDNEKMN  |
| 12 | 152 | ROCK1    | E524V             | VENEVSTLKDQLVDLKKVSQNSQLA  |
| 12 | 153 | RNF213   | A1254S            | EPLSEPKEDQEASELLEPPEEESER  |
| 12 | 154 | EIF4A3   | D169Y             | QHVVAGTPGRVFMIRRRSLRTRAI   |
| 12 | 155 | POLR2A   | G816V             | HRTLPHFIKDDYVPESRGFVENSYL  |
| 12 | 156 | TTYH2    | Y297C             | TEGQISTEVTRYCLYCSQSGSSPFQ  |
| 13 | 157 | WIP1I    | R212L             | KLASASEKGTVILVFSVPDQKLYE   |
| 13 | 158 | RABEP1   | K427N             | GSLQSKALGYNYNAKSAGNLDESDF  |
| 13 | 159 | SRCIN1   | V151L             | MREQVGGWTVDPCLLSSLCSHLHG   |
| 13 | 160 | AP2B1    | Q59H              | VSSLFPDVVNCMHTDNLELKKLVYL  |
| 13 | 161 | ZNF830   | W365C             | DEGELQDLLSQDCRVKGALL       |
| 13 | 162 | SSH2     | H487Y             | ASKQRHNKLRWSYSDSDLSDHHEPI  |
| 13 | 163 | SPECC1   | E745D             | VVANDIKCEAQQLDRLTVKRKLEEE  |
| 13 | 164 | ALDH3A2  | K447 insertion KV | ANKLRYPPNSQSKVVDWKGKFLKLR  |
| 13 | 165 | FAM83G   | A767S             | LPDPGSPRLAQNSRPMTDGRATEEH  |
| 13 | 166 | FANCA    | E1293K            | LPKAFHVCAAILKCLEKRKISWLAL  |
| 13 | 167 | ZNF778   | G641V             | SSHLVHIRTHTVEKPYICKECGKA   |
| 13 | 168 | NUDT7    | V111L             | LRPHQVEVVCCLLPCLIDTDLTTP   |
| 13 | 169 | DST      | D24A              | WNAKLVGLMCCMAERDKVQKKTFTK  |
| 14 | 170 | NUDT7    | V111L             | LRPHQVEVVCCLLPCLIDVRVS     |
| 14 | 171 | AMFR     | V440A             | RIASWLPSFSVEAMHTTNILGITQA  |
| 14 | 172 | TAOK2    | R555P             | ARRHQAIKEKEAPAAQAEERKFQQH  |
| 14 | 173 | ETFA     | D236Y             | GLKSGENFKLLYYLADQLHAAVGAS  |
| 14 | 174 | UBL7     | D352Y             | PQLQQLRDMGIQYDELSLRLAQATG  |
| 14 | 175 | SPG11    | 303-304 deletion  | QHPGHLLCERILDLPQPKGVDDED   |
| 14 | 176 | SPG11    | A340T             | AKFSFQIDRSWKTQLSSLNETIKNS  |
| 14 | 177 | MGA      | R2543S            | QEFLPKKISGDMSGIQYKWKESER   |
| 14 | 178 | ZNF770   | C16S              | LCKLNPSYLKITSGRKSKQITPTYY  |
| 14 | 179 | YLPM1    | G1480W            | EQKEQLQKMKDFWSEPMADHLPQP   |
| 14 | 180 | NUMB     | S288P             | SFRGFPALSQKMPFPKRQLSLRINE  |
| 14 | 181 | SLC39A9  | A87S              | SETHNVIASDKASEKSVVHEHEHSH  |
| 14 | 182 | SYNE2    | R3216T            | CSIKAVTAIEKQTEENSSEASDVET  |
| 15 | 183 | DLGAP5   | K156N             | KAIPSSVRITRSNAKDQMEQTKIDN  |
| 15 | 184 | C1orf43  | E80D              | YRMKALDAIRTSDFPHSEGRHPRS   |
| 15 | 185 | SLC22A15 | Q517L             | GEEALSLQALDPLQCVDKESSLGSE  |
| 15 | 186 | AHNKA2   | P588N             | TEGQIRMPKFKINSLGWSPSKHTKT  |
| 15 | 187 | AHNKA2   | G844W             | KFKMPKFKMPSFWVSAPGKSMEDSV  |
| 15 | 188 | DYNC1H1  | V1762A            | VVLSAQIAWSENAETALSSMGGGGD  |
| 15 | 189 | DYNC1H1  | R223L             | PMITNVAKQCYELGEKPKVTDGDK   |
| 15 | 190 | DIAPH3   | E507D             | ICIDQAKLEEFEDKASELYKKFEKE  |
| 15 | 191 | HSPH1    | G204E             | DEKPRIVFVDMESAFAQVSACAFN   |
| 15 | 192 | CRL1     | C78F              | LSVEEQLSLISGFPNIEAVEGAMH   |
| 15 | 193 | TMTC2    | Q634R             | YEEALSVYKEAIRKMPRQFAPQSLY  |
| 15 | 194 | RAB21    | Y89C              | GQERFHALGPIYCRDSNGAILVYDI  |
| 15 | 195 | CDCA3    | P175R             | WKPNSSKVLGRSRLTILQDDNSPGT  |
| 16 | 196 | PIGV     | M227I             | HSQCQGFSSLTILNPLRQLFKLMA   |
| 16 | 197 | TENC1    | P1059H            | SQMPWLVASPEPHQSSPTPAFPLAA  |
| 16 | 198 | FGD4     | Q686L             | LYMYGAPQDVRALATIPLLGYVVDE  |
| 16 | 199 | ETNK1    | F202L             | QAHGCAPQLYCTLNGLCYEFIQGE   |
| 16 | 200 | ZNF268   | L195I             | TFGKLCLLSTKYISRQKPHKCGTHG  |
| 16 | 201 | RILPL1   | G219R             | DLRHRVTVVEAQRKALIEQKVELEA  |
| 16 | 202 | TCP11L2  | G477C             | GLAVIQQEALCSQYANIVNLNKQ    |
| 16 | 203 | CCDC53   | V47A              | VHTVQFLNRFSTACEEKLADLSLRI  |
| 16 | 204 | NUDT7    | V111L             | LRPHQVEVVCCLLPCLIDRWGSRVY  |
| 16 | 205 | WRAP73   | V208L             | WDTCLEVRILNHLTWKMITEFGHPA  |



|    |     |           |                  |                              |
|----|-----|-----------|------------------|------------------------------|
| 16 | 206 | GAS2L3    | C110F            | EESGNFPMRKVPFKKDAASGSFFAR    |
| 16 | 207 | ANKS1B    | K362N            | HTISDHYLDNLSNISEEELGKNGSQ    |
| 16 | 208 | PCF11     | A926S            | GLRFEFGHGPGSGAIRFDGPHGQPG    |
| 17 | 209 | RSF1      | D681N            | LKEDSEFTKVMNNLDNAQTSGIEE     |
| 17 | 210 | DGAT2     | I157M            | VKTHNLLTRNYMFGYHPHGIMGLG     |
| 17 | 211 | BBS1      | A11S             | MAAASSSDSDSCGAESNEANSKW      |
| 17 | 212 | SF3B2     | Q873 frameshift  | SDMVAEHAAKQKQKKTSSAPGQPWGQEI |
| 17 | 213 | EIF1AD    | E123V            | EKHNNRRNRQTQPVLPAEPQLSGEES   |
| 17 | 214 | TMEM216   | I41T             | WYNATYFLELFTFLYKGVLLPYPT     |
| 17 | 215 | TMEM109   | A191S            | VPDPSTRALLLSLLILYALLSRLT     |
| 17 | 216 | OSBP      | R320T            | LEQLAKQHNHLETAFRGATVLPANT    |
| 17 | 217 | PTPRJ     | G75V             | STAESFHKQNGTVTPQVETNTSEDG    |
| 17 | 218 | ZNF408    | G505V            | CGRAFRQRGNLRVHLRLHTGERPYR    |
| 17 | 219 | KIF18A    | E202Q            | HGLTLHQPKSSEQILHLLDNGNKNR    |
| 17 | 220 | ARHGAP32  | D827N            | GASFLDSPGYSKNKPSANKKDAETG    |
| 17 | 221 | MUC5B     | L1907I           | ATPSSTPGTWTIKPTTTATTAS       |
| 18 | 222 | DIXDC1    | I23F             | SPSPIHSAKSESFITQSEEKADFVI    |
| 18 | 223 | FDX1      | D132H            | EDHIYEKLDATHEENDMLDLAYGL     |
| 18 | 224 | ADM       | H122Q            | CRFGTCTVQKLAQQIYQFTDKDKDN    |
| 18 | 225 | PFKFB3    | V371F            | RQENVLVICHQAFRLCLLAYFLDKS    |
| 18 | 226 | FAM107B   | R43S             | QDLHRELLMNQKSGLAPQNKPELQK    |
| 18 | 227 | DNTTIP2   | A303T            | ETKQCNCKDLDEDTNGITDEGKEINE   |
| 18 | 228 | LRRC8B    | L545F            | GFQDLKNLRTLYFKSSLSRIPQVVT    |
| 18 | 229 | PKN2      | D123Y            | DPEDITDCPRTPYTPNNDPRCSTSN    |
| 18 | 230 | HS2ST1    | E334 frameshift  | EQFQFIRAHAVREKRWRPLHPRTKLFL  |
| 18 | 231 | NOL9      | T343S            | DYLECDLQGTEFSPPGCISLLNITE    |
| 18 | 232 | INADL     | R1506M           | RNSSHEEAITALMQTPQKVRLLVYR    |
| 18 | 233 | WRAP73    | V253L            | GSYDGVKVRILNHLTWKMITEFGHPA   |
| 18 | 234 | CCDC53    | V47A             | VHTVQFLNRFSTACEETGSCCITEA    |
| 19 | 235 | MFSD5     | T549I            | VRHDAELRVSPSIEEPIYAPEL       |
| 19 | 236 | ASAP3     | A244P            | AAQSLFPFIEKLPASVHALHQAQED    |
| 19 | 237 | HEATR1    | M619I            | VVINDDTESAEIKIAIYLSKSGIC     |
| 19 | 238 | TARBP1    | V544L            | CYLLQTAMNLLDLEKVSLSDVSTFL    |
| 19 | 239 | OBSCN     | G4333R           | FTQDLKTKEASERATATLQCELSKV    |
| 19 | 240 | OBSCN     | A2103T           | QGTATMEVQLSHTDVGSWTRDGLR     |
| 19 | 241 | CCDC42BPA | V1277L           | QLVAVISGRNRHLRLFPMSALDGRE    |
| 19 | 242 | IARS2     | V443F            | QNKAVLEEGTDVFKMLQTAKNLLK     |
| 19 | 243 | GPATCH2   | K416N            | QLLRDNRAERGHKNKCSVRTASRQT    |
| 19 | 244 | ZBED6     | S355I            | LSDTLHGEKSTGIQDLTAEDLSDSD    |
| 19 | 245 | OTUD3     | H146D            | AGNDAIVAFARNDQLNVVIHQNLAP    |
| 19 | 246 | SWT1      | S257Y            | QKLVEENVFNIDYNNSTKQOEEREY    |
| 19 | 247 | CACNA1E   | R1297L           | VDHEKNKMEVKGLEWKRHEFHFDNI    |
| 19 | 248 | CEP350    | R1167L           | QHSSGAQSAASSLSTSSKGGKGGK     |
| 20 | 249 | CRP       | G97V             | WSKDIGYSFTVGVSEILFEVPEVTV    |
| 20 | 250 | DNAJC16   | G93I             | SNEEKRSNYDQYIDAGENQGYQKQQ    |
| 20 | 251 | ARHGEF2   | V500M            | KDVLVLLMTDVLMLFQEKDQKYIFP    |
| 20 | 252 | ASH1L     | E2901K           | ATANVSEGEKKTKESSQEPQSTCTP    |
| 20 | 253 | UBAP2L    | G640V            | QLQTTQSVEGATVSAVKSDSPSTSS    |
| 20 | 254 | NIN       | K1192 frameshift | NPSGTMNPTEQEN                |
| 20 | 255 | C1orf43   | K62N             | ARLLQLETQGNQNPFFHSEGRHPRS    |
| 20 | 256 | TPM3      | V59L             | NLRARVDINCSPLGTFWALINKVSA    |
| 20 | 257 | SIRT5     | H286Q            | PCGTTLPEALACQENETVS          |
| 20 | 258 | SLC39A1   | H86R             | HGLLPGPGDADRGLQGAVRAVTS      |
| 20 | 259 | SELENBP1  | P188S            | IVQTLSLKDGILSLEIRFLHNPDA     |
| 20 | 260 | TBX15     | P453T            | PSNGAFGERQYLTSGMEHSMHMISP    |
| 20 | 261 | FKBP3     | N158 frameshift  | DTNIQTSAKKKKKCQAFKF          |
| 20 | 262 | RHOC      | G144C            | AKMKQEPVRSEECRDMANRISAFGY    |
| 20 | 263 | KCNN4     | G50V             | GLMVLHAEMLWVFGCSTHFG         |

Supplementary Table 4. Predicted high-affinity peptides from 4112 TMG-9.

| Short peptide pool (SPP) ID | Peptide ID | Peptide sequence | Allele              | IEDB      |            | NetMHC     |               |
|-----------------------------|------------|------------------|---------------------|-----------|------------|------------|---------------|
|                             |            |                  |                     | % Rank    | IC50 (nM)  | % Rank     | Affinity (nM) |
| 1                           | 1          | AVAYKQPASNSK     | HLA-A*03:01         | 0.9       | 129        |            |               |
| 1                           | 2          | AWSYDSTLL        | HLA-C*04:01         | 0.4       | 1862       |            |               |
| 1                           | 3          | CAPQLYCTL        | HLA-C*12:03         |           |            | 1.1        | 611           |
| 1                           | 4          | DNIFLEILYSTY     | HLA-B*18:01         | 0.8       | 362        |            |               |
| 1                           | 5          | DSYLALVDKNIIGY   | HLA-A*25:01/B*18:01 | 0.5/0.8   | 1202/318   |            |               |
| 1                           | 6          | DVLMFLQEKDQKY    | HLA-A*25:01         | 0.2       | 267        |            |               |
| 1                           | 7          | DVLVLLMTDVLMF    | HLA-A*25:01         | 0.8       | 2258       |            |               |
| 2                           | 8          | DVPRFFSMS        | HLA-A*25:01         |           |            | 1.7        | 11595         |
| 2                           | 9          | EILYSTYPK        | HLA-A*03:01         |           |            | 2          | 1050          |
| 2                           | 10         | EILYSTYPKL       | HLA-A*25:01         | 1         | 4079       |            |               |
| 2                           | 11         | ETAFRGAT         | HLA-A*25:01         | 0.7       | 4127       |            |               |
| 2                           | 12         | ETAFRGATV        | HLA-A*25:01         |           |            | 0.5        | 4192          |
| 2                           | 13         | FADGLSLCL        | HLA-C*04:01         |           |            | 0.7        | 6237          |
| 2                           | 14         | FADGLSLCLV       | HLA-C*12:03         | 0.4       | 12         |            |               |
| 3                           | 15         | FADGLSLCLVDYI    | HLA-C*12:03         | 0.2       | 8          |            |               |
| 3                           | 16         | FFSMSEKRNSRAKL   | HLA-C*04:01         | 0.4       | 2262       |            |               |
| 3                           | 17         | FLEILYSTY        | HLA-A*25:01/C*12:03 |           |            | 0.8 / 0.7  | 6350 / 330    |
| 3                           | 18         | GEGTGPLL         | HLA-C*04:01         | 0.7       | 3951       |            |               |
| 3                           | 19         | GEGTGPLL         | HLA-C*04:01         |           |            | 1.2        | 7571          |
| 3                           | 20         | GMMEGEGTGPLL     | HLA-C*04:01         | 0.6       | 3228       |            |               |
| 3                           | 21         | ILYSTYPKL        | HLA-C*04:01         |           |            | 0.4        | 4756          |
| 4                           | 22         | ILYSTYPKLK       | HLA-A*03:01         | 0.15      | 12         |            |               |
| 4                           | 23         | KLEDVPRFF        | HLA-C*04:01/C*12:03 |           |            | 1.7 / 1.8  | 8834 / 1516   |
| 4                           | 24         | LALVDKNIIGYI     | HLA-C*12:03         | 0.8       | 34         |            |               |
| 4                           | 25         | LEILYSTYPKL      | HLA-C*04:01         | 0.9       | 4417       |            |               |
| 4                           | 26         | LFADGLSLC        | HLA-C*04:01         |           |            | 1.1        | 7466          |
| 4                           | 27         | LLMTDVLMF        | HLA-C*04:01         |           |            | 0.8        | 6544          |
| 4                           | 28         | LLMTDVLMFLQEK    | HLA-A*03:01         | 0.7       | 78         |            |               |
| 5                           | 29         | LMTDVLMFL        | HLA-C*04:01         |           |            | 1.2        | 7671          |
| 5                           | 30         | LVDKNIIGY        | HLA-A*25:01/C*04:01 |           |            | 1.4 / 1.1  | 10282 / 7427  |
| 5                           | 31         | LWDQPSSPQHPR     | HLA-C*04:01         | 0.8       | 3948       |            |               |
| 5                           | 32         | LWDQPSSPQHPR     | HLA-C*04:01         | 0.4       | 2578       |            |               |
| 5                           | 33         | LYSTYPKL         | HLA-C*04:01         | 0.8       | 4171       |            |               |
| 5                           | 34         | LYSTYPKLK        | HLA-C*04:01         |           |            | 1.9        | 9145          |
| 5                           | 35         | MEGEGTGPL        | HLA-B*18:01/C*04:01 |           |            | 0.3 / 0.25 | 98 / 4161     |
| 6                           | 36         | MEGEGTGPLL       | HLA-C*04:01         | 0.4       | 2251       |            |               |
| 6                           | 37         | MEGEGTGPLLRSQ    | HLA-B*18:01         | 0.8       | 207        |            |               |
| 6                           | 38         | MMEGEGTGPLL      | HLA-C*04:01         | 0.5       | 2899       |            |               |
| 6                           | 39         | NIFLEILYSTY      | HLA-A*25:01         | 0.3       | 613        |            |               |
| 6                           | 40         | NIIGYIASL        | HLA-A*25:01/C*12:03 |           |            | 0.03 / 1.5 | 270 / 1102    |
| 6                           | 41         | NIIGYIASLHEL     | HLA-A*25:01         | 0.6       | 1701       |            |               |
| 6                           | 42         | QWRRVAWSYDSTLL   | HLA-C*04:01         | 0.2       | 967        |            |               |
| 7                           | 43         | RATPPTGEP        | HLA-C*12:03         |           |            | 1.8        | 1571          |
| 7                           | 44         | RATPPTGEPGFPV    | HLA-C*12:03         | 0.7       | 24         |            |               |
| 7                           | 45         | RFFSMSEKR        | HLA-C*04:01         |           |            | 0.3        | 4630          |
| 7                           | 46         | RFFSMSEKRNSRAK   | HLA-A*03:01         | 1         | 152        |            |               |
| 7                           | 47         | RVAWSYDSTLLAY    | HLA-A*25:01         | 0.5       | 1158       |            |               |
| 7                           | 48         | SEPDVSGKC        | HLA-C*04:01         |           |            | 0.8        | 6443          |
| 7                           | 49         | SEPDVSGKCIIEVF   | HLA-B*44:03/C*04:01 | 0.8 / 0.4 | 461 / 2314 |            |               |
| 8                           | 50         | STYPKLDAREILK    | HLA-A*03:01         | 0.3       | 40         |            |               |
| 8                           | 51         | SYDSTLLAY        | HLA-B*18:01         |           |            | 1.9        | 2617          |
| 8                           | 52         | TAFRGATV         | HLA-C*12:03         | 0.2       | 5          |            |               |
| 8                           | 53         | TAFRGATV         | HLA-C*04:01         |           |            | 0.8        | 6513          |
| 8                           | 54         | VAWSYDSTL        | HLA-C*12:03         |           |            | 0.4        | 144           |
| 8                           | 55         | VAYKQPASNSK      | HLA-A*03:01         | 0.9       | 750        |            |               |
| 8                           | 56         | VLMFLQEK         | HLA-A*03:01         | 0.9       | 57         |            |               |
| 9                           | 57         | VWDALFADGLSLCL   | HLA-C*04:01         | 0.4       | 2384       |            |               |
| 9                           | 58         | WRRVAWSYDSTLL    | HLA-C*04:01         | 0.4       | 1789       |            |               |
| 9                           | 59         | WSYDSTLL         | HLA-C*12:03         | 0.9       | 36         |            |               |
| 9                           | 60         | WSYDSTLLA        | HLA-C*12:03         |           |            | 1.3        | 917           |
| 9                           | 61         | WSYDSTLLAY       | HLA-A*25:01/C*12:03 | 0.5 / 0.9 | 1535 / 35  |            |               |
| 9                           | 62         | YLALVDKNIIGY     | HLA-A*25:01         | 0.8       | 2969       |            |               |
| 9                           | 63         | YSEPDVSGK        | HLA-C*12:03         |           |            | 1.9        | 1687          |
| 10                          | 64         | YSEPDVSGKCI      | HLA-C*12:03         | 0.6       | 25         |            |               |
| 10                          | 65         | YSEPDVSGKCIIEVF  | HLA-C*12:03         | 0.7       | 24         |            |               |
| 10                          | 66         | YSEPDVSGKCIIEVF  | HLA-C*12:03         | 0.7       | 30         |            |               |
| 10                          | 67         | YVGGMMEGEGTGPL   | HLA-A*25:01         | 0.6       | 1753       |            |               |

Supplementary Table 5. 4171 peptide library

| Peptide pool ID | Peptide ID | Gene name | Position and change of mutated amino acid | Mutated amino acid sequence |
|-----------------|------------|-----------|-------------------------------------------|-----------------------------|
| 1               | 1          | KCNH6     | R362H                                     | MVAaipfdllfhtgsdettlligl    |
| 1               | 2          | CD226     | T157M                                     | GKNVTLTCQPOMMWPVQAVRWEKIQ   |
| 1               | 3          | BRCA1     | N1384S                                    | LCLPQSIYRSELSVYAFGEHILQIS   |
| 1               | 4          | ZNF335    | L26H                                      | LAGCPAPYPAAKHFPSLFHAPQEEV   |
| 1               | 5          | TP53      | R209Q                                     | YMCNSSCMGGMNQRPILTITLEDSE   |
| 1               | 6          | MKNK1     | G4C                                       | MILCHCSLDLLGSSNP            |
| 1               | 7          | ZHX3      | R720C                                     | SLEMPSSHILAECKVSPKINLKNL    |
| 1               | 8          | POLD1     | P815L                                     | EAADWVSGHFPSLRIRLEFEKVYFPY  |
| 1               | 9          | KRAS      | G12D                                      | MTEYKLVVVGADGVGKSALTIQLI    |
| 1               | 10         | PIK3CA    | R93W                                      | EFFDETRRLCDLWLFQPFKVIIEPV   |
| 1               | 11         | LCE1F     | R87H                                      | CCLSHHRRRRSHHHRPQSSDCCSQP   |
| 1               | 12         | CTAG2     | A60T                                      | AGAARASGPRGGTTPRGPHGGAASAQ  |
| 1               | 13         | PDLIM3    | A158V                                     | PIGLYSTSNIQDVLHGQLRGLIPSS   |
| 1               | 14         | ZNF181    | I111N                                     | FHSKSTLSEPPQKNSAEGNSHKYDIL  |
| 2               | 15         | TEX13B    | R88H                                      | VRFAHRQQQLQNHVRVQWLOGFAKLH  |
| 2               | 16         | UGT3A1    | R377W                                     | VRVVAKNYGVSIWLNQVTDADTLTLT  |
| 2               | 17         | PIK3CA    | Q546E                                     | ISTRDPLSEITEEEKDFLWSHRHYC   |
| 2               | 18         | TMEM232   | L76F                                      | KEELLEARKIIFRCKRKLGLKTLG    |
| 2               | 19         | TATDN3    | L8F                                       | MRAAGVGFVDCHCHLSAPDF        |
| 2               | 20         | CHST11    | T88M                                      | VLHQMRDQVTDMCANSATSRKRR     |
| 2               | 21         | SYNE1     | R471W                                     | LSLSLAQPLRSEWSGRDTPASVDSI   |
| 2               | 22         | NME5      | M5V                                       | MEISVPPPQIYVEKTLA           |
| 2               | 23         | SLAIN1    | S292T                                     | SFLQPPKPLSSLTFLRDGNWRDGCY   |
| 2               | 24         | SCN5A     | R1644H                                    | RILRLIRGAKGIHTLLFALMMSLPA   |
| 2               | 25         | PLCD3     | R173C                                     | QRWVRGLTKLRACLDAMSQRERLDH   |
| 2               | 26         | VCAN      | I663T                                     | TEIELFPYSGDKTLVEGISTVYIPS   |
| 2               | 27         | NOTCH3    | H2227R                                    | PGHGEEYPVAGARSSPPKARFLRVP   |
| 2               | 28         | TRIM43    | L73S                                      | KMDFKTNILLKNSVTIARKASLWQF   |
| 3               | 29         | LRP2      | I4371V                                    | FIESTTECDAAVELPINLPPPCRC    |
| 3               | 30         | APOB      | L1238F                                    | VGSKLIVAMSSWFQKASGSLPYTQT   |
| 3               | 31         | NHSL1     | R436W                                     | VIAIPTAQSAQWESKSSGSSHARI    |
| 3               | 32         | LOR       | C103W                                     | SGGGSSGGSGWFSGGGGSGCFS      |
| 3               | 33         | SIN3A     | N520I                                     | LGKFPPELFNWFKIFLGYKESVHLET  |
| 3               | 34         | CPAMD8    | R1270H                                    | LTAFVLKSFQAQHSFIVDPRELAA    |
| 3               | 35         | APC2      | G322D                                     | SGCLPLLQLHDETAAGGRAGAP      |
| 3               | 36         | ATP8B3    | T1104M                                    | VNFFMTLWISRDMAGPASFSDHQSF   |
| 3               | 37         | AMY2A     | R267Q                                     | EPIKSSDYFGNGQVTEFKYGAKLGT   |
| 3               | 38         | CROT      | G565A                                     | FTDPLFSKSGGGANFVLSLTVGYL    |
| 3               | 39         | KIF5C     | R859C                                     | VHKQLVRDNADLCCLEPKLEKRLRA   |
| 3               | 40         | GFRA2     | F138V                                     | RTDHLCSRSLADVHANCRASYQTVT   |
| 3               | 41         | ARHGAP15  | T53I                                      | SKSMILTDVGKVIPIISRHRNRHSQ   |
| 3               | 42         | APBB1IP   | P270T                                     | LEKEEKYAVFKNTQNFYLDNRGKKE   |
| 4               | 43         | UBR7      | P39 frameshift                            | NSKFKNLECKLLLTQR            |
| 4               | 44         | UBR7      | P115 frameshift                           | NSKFKNLECKLLLFQMR           |
| 4               | 45         | DLGAP4    | D944N                                     | KSKPAVSRDKASNASDKQRQEARKR   |
| 4               | 46         | GRID2IP   | T349M                                     | VVSMLQSGGAMPMLVVEGLVPFAS    |
| 4               | 47         | AP4E1     | A284T                                     | SPKINKYLGLKTLTYVIQQDPTLA    |
| 4               | 48         | ZNF707    | R167Q                                     | QRCGRRPGRRRRQKQRAVELSFICG   |
| 4               | 49         | SVEP1     | G1021R                                    | NLEHFTCESCRIRSYQDEEGQLECK   |
| 4               | 50         | ZDBF2     | R12H                                      | MQRQGYCSYCHVQYNNLEQHLFS     |
| 4               | 51         | VWDE      | I68F                                      | DHSLSPGWYRFLFLDRPAEMPTKCV   |
| 4               | 52         | PPAPDC2   | S21R                                      | EGRPLGVSASSRSPPGSPAHHGGGG   |
| 4               | 53         | FAM71A    | S519F                                     | KSGRSLWTTSSGFSKGLGRVSSFLR   |
| 4               | 54         | TRPC4     | L227I                                     | DPFLTAFQLSWEIQELSKVENEFKS   |
| 4               | 55         | SERTAD4   | G64E                                      | GAGPPLAGSHYREISNPITTSKITIY  |
| 4               | 56         | FANCM     | A1052 frameshift                          | SGASCSSSRPHLLGHILLDLRRKE    |
| 5               | 57         | FANCM     | A1052 frameshift                          | HLLGHILLDLRRKEKEPVFL        |
| 5               | 58         | UNC79     | S516T                                     | VQEQALLWLHVLTELDIMVPLQLLI   |
| 5               | 59         | SIGLEC8   | R68W                                      | WTSDSPVHGYWFWAGDRPYQDAPVA   |
| 5               | 60         | GALNT10   | R30C                                      | YEISFKVVMCGGCMEDIPCSRVGHI   |
| 5               | 61         | GALNT10   | R200C                                     | FLLAMQVVMCGGCMEDIPCSRVGHI   |
| 5               | 62         | OR2B3     | F310L                                     | KEAFKRLMPRIFLCKK            |
| 5               | 63         | PTPLA     | D142G                                     | PPRPINFCIFGRGRVSPCWPGWSRT   |
| 5               | 64         | PRMT3     | I380S                                     | SDLEFSSDFTLKSTRTSMCTAIAGY   |
| 5               | 65         | MYT1      | A359T                                     | SCSSSPGVKSPDTSQRHSSTAPSS    |
| 5               | 66         | NADSYN1   | I109M                                     | SGGVDSAAATCLMYSMCCQVCEAVR   |
| 5               | 67         | ATR       | N811I                                     | ETDVKAVLGTLLILMEDPKDVRVA    |

|   |     |            |        |                             |
|---|-----|------------|--------|-----------------------------|
| 5 | 68  | OR13C8     | R122C  | TECMILGTMALDCYVAICYPLRYPV   |
| 5 | 69  | MAOA       | R96W   | RKFVGGSGQVSEWIMDLLGDQVKLN   |
| 5 | 70  | LILRB4     | R188W  | RSPMDTFLLIKAWAAHPLLHLRSEH   |
| 6 | 71  | OR5B17     | A103P  | SYSACAAQMFFFCVPVFATVENYLLSS |
| 6 | 72  | KCNS2      | R418Q  | ITLIFNKFSHFYQRQKQLESAMRSC   |
| 6 | 73  | ZFAND4     | S539R  | NLQHFQEENFRKRSPQLEHTGVFLS   |
| 6 | 74  | TMEM132B   | A80T   | KKGRGCSLQYQHTTVRVLTQFVAES   |
| 6 | 75  | NBEAL2     | P386L  | YPHLQEVLSQSHGLPTHRLLQELNLM  |
| 6 | 76  | SLCO6A1    | L376F  | GLVLIPGGALGQFLGGVIVSTLEMS   |
| 6 | 77  | GTF3C1     | R777S  | KKSDNKMGITPLSNYHPIVVPGLGR   |
| 6 | 78  | MAGIX      | N102K  | HRPQVGDVLVHLIKGESTQGLTHAQA  |
| 6 | 79  | MAGIX      | N178K  | GRLEVGDVLVHLIKGESTQGLTHAQA  |
| 6 | 80  | STAT5B     | H588N  | GVMEVLKHKHLKPNWWDGAILGFVVK  |
| 6 | 81  | SPAG17     | R225Q  | VKKEDTIVPPNLQSRSWETFPVSVEK  |
| 6 | 82  | DNAH5      | L3563V | KARKIPFGKNLNVSEMLIDAPTISE   |
| 6 | 83  | PCDHB2     | K74Q   | AVRGARVVSXGKQMKMLQFDRQTGDL  |
| 6 | 84  | ATP2B2     | V194M  | LQSRIEQEQKFTMVRAGQVQIPVA    |
| 7 | 85  | FBXO11     | L87V   | LPDEVVLKIFSYVLEQDLCRAACVC   |
| 7 | 86  | NUP107     | E681D  | KFLASKKHEAAKDVFKIPQDSIAE    |
| 7 | 87  | BPIFB3     | E23D   | LLLLWGLATPCQDLETVGTLARID    |
| 7 | 88  | PCDHB12    | L327R  | YSIIIQATDGGGRFGKSTVRIQVMD   |
| 7 | 89  | GUCY2F     | G434R  | YTVDMEMELLRFRGTPHFPGGRPP    |
| 7 | 90  | KRT73      | K137T  | IQKVRAQEREQITVLNKFKASFIDK   |
| 7 | 91  | GNAS       | R314Q  | PLMPRREEKYPLQGTDPPLPGQPQR   |
| 7 | 92  | KMT2D      | R5500W | FDKEDKIISSWRIPKGEELTYDY     |
| 7 | 93  | DCHS2      | II155F | DRRLRSLTAQIVFLDVNDHNPTFIS   |
| 7 | 94  | ARMC8      | W355C  | QQLRTSFQDHAVCKPLMKVLQNPAD   |
| 7 | 95  | CCDC151    | E73A   | GAGKPSVHSQVAALHKKIQLEGEDR   |
| 7 | 96  | CCDC151    | E73A   | GAGKPSVHSQVAALHKKIQLLESHS   |
| 7 | 97  | OR52N5     | F268L  | AIITVYPAFFTLFAHRFGGHTIPP    |
| 7 | 98  | MICALL2    | K439N  | LGPDPAFGLGLGNLLSLQGACGQQ    |
| 8 | 99  | PLG        | N428K  | YPNAGLTMNYCRKPDADKGPWCFTT   |
| 8 | 100 | C1orf101   | I224M  | LSDDERRSVAHVMLSRDGVIVFLNG   |
| 8 | 101 | DDX21      | K2N    | HISGATSVDQRSVINSNVGFVTMIL   |
| 8 | 102 | PASD1      | L561V  | MNMRGEKRRDKVNP              |
| 8 | 103 | PCDHGA4    | L798R  | EKSEPLLITQDLRETKGDPNLQVSO   |
| 8 | 104 | PCDHGA4    | L798R  | EKSEPLLITQDLRETKGDPNLQVAP   |
| 8 | 105 | ATF7       | E345D  | KLWVSSLEKKAEDLTSQNIQLSNEV   |
| 8 | 106 | SMAD6      | S133I  | RTRSKIGFGLLIIKEPDGVWAYNRG   |
| 8 | 107 | CYFIP1     | L253P  | MKRLESKYAPLHPVPLIERLGTPOQ   |
| 8 | 108 | MED15      | Q241P  | QQQQQQQALQAPPIQPPMQPQQPQ    |
| 8 | 109 | ZKSCAN4    | G146S  | EDIAQIPTHAEASEQEGRLQRKQKN   |
| 8 | 110 | TERF1      | Q275H  | VVESKRTRTITSHDKPSGNDVEMET   |
| 8 | 111 | CYFIP1     | K606R  | LESLIADKSGSKRTLRSLEGPTIL    |
| 8 | 112 | CD40       | A17T   | PLQCVLWGCLLTTVHPEPPTACREK   |
| 8 | 113 | SLC11A1    | R206C  | SALVKSREIDRACRADIREANMYFL   |
| 9 | 114 | PRR34      | T53P   | RARCPQSAHPAPPRGALTFWAPGSW   |
| 9 | 115 | ZNF729     | F416Y  | YKCEECGKAFSQYSTLKKHKIIHTG   |
| 9 | 116 | NRCAM      | G612R  | HLVVADVSDDDSRITYTCVANITLDS  |
| 9 | 117 | KIAA0020   | K4N    | MEVNGKKQFTGKSTKT            |
| 9 | 118 | CILP2      | E504G  | EPLRFARILLGQGPIGFTAYQGDFT   |
| 9 | 119 | ATM        | W579C  | NRSFSLKESIMKCLLFYQLEGDLEN   |
| 9 | 120 | WNK2       | H758P  | POPVVLPQVPPPLPPYLAPASQVG    |
| 9 | 121 | DLGAP2     | S848T  | QNMDPSAMPRTTQDLAGYWDMLQL    |
| 9 | 122 | TCF3       | A162S  | YPSYSGSSRRRASDGLDTPQPKVR    |
| 9 | 123 | OPRM1      | S83R   | NASNCTDALAYSRCSPAPSPGSVWN   |
| 9 | 124 | LEFTY1     | F78I   | QRSHGDRSRGKRISQSFREVAGRFL   |
| 9 | 125 | THSD7B     | S993Y  | CSSSCGIVRIRYKWLKEKPYNGGR    |
| 9 | 126 | CCDC88A    | S583C  | ERENRKLKKTLDLCKNLTFQLESLE   |
| 9 | 127 | KRTAP10-12 | G232V  | SCQPCSGRLASCVSLLCRPTCSRLA   |
| 9 | 128 | SYK        | E26K   | PPFFGNITREEAKDYLVQGGMSDGL   |
